# Supplementary material for: Role of Blood Oxygen Saturation During Post-Natal Human Cardiomyocyte Cell Cycle Activities
Source: PubMed Central journal article supplement — JACC Basic Transl Sci. 2020 Apr 22;5(5):447–60. doi: 10.1016/j.jacbts.2020.02.008 (PMC7251192; doi:10.1016/j.jacbts.2020.02.008), 2020-04-22

Supplemental Table S1 primer sequences

| Gene                                | forward primer                                               | reverse primer                                                 |
|-------------------------------------|--------------------------------------------------------------|----------------------------------------------------------------|
| Ki67                                | 5'- ACTTCCCATGTCTCCAAGG -3'                                  | 5'- GCAGTGGTATCAACGCAGAG - 3'<br>5'- GGCATGGACTGTGGTCATGAG -   |
| GAPDH                               | 5'- TGCACCACCAACTGCTTAGC - 3'                                | 3'                                                             |
| Cyclin D2                           | 5'- GCAAATGTGTACGTGCATGC - 3'<br>5'- GAACGTGAAAAAGAAAAGTCTCG | 5'- CCGATGATTTGCTGGGGATG - 3'<br>5'- CCTTATCAAGATGCGAACTCACA - |
| HIF1A                               | - 3'                                                         | 3'                                                             |
| AURKB                               | 5'-CAGTGGGACACCCGACATC-3'<br>5'-                             | 5'-GTACACGTTTCCAAACTTGCC-3'                                    |
| mitochondrial DNA minimal arc       | GCTGGGTAGCTCTAAACAATGTATTC<br>A-3'<br>5'-                    | 5'-CCATGT<br>ACTAACAAATGTCTAAAATGGT-3'                         |
| nuclear DNA within the beta-2M gene | GCTGGGTAGCTCTAAACAATGTATTC<br>A-3'                           | 5'-AGAGCTCCCGTGAGTGGTTA-3'                                     |

Supplemental Table S2 Reagent and antibodies

| Name                                       | Cat#               | company                                                    |
|--------------------------------------------|--------------------|------------------------------------------------------------|
| WGA                                        | MP00831            | Life Technologies                                          |
| anti-troponin T                            | ab8295             | Abcam                                                      |
| anti-mouse secondary antibodies            | ab150107           | Abcam                                                      |
| anti-Ki67                                  | ab154201           | Abcam                                                      |
| anti-8-oxoG                                | ab64548            | Abcam                                                      |
| anti-rabbit secondary antibody             | 4409               | CST                                                        |
| iPS Cell Lines                             | del-AR1034ZIMA 001 | allelebiotech                                              |
| STEMdiff Cardiomyocyte Differentiation Kit |                    | STEMCELL Technologies, Vancouver, British Columbia, Canada |
| anti-sarcomeric $\alpha$ -actinin          | ab9465             | Abcam                                                      |
| YAP1 complementary DNA (cDNA)              |                    | Genechem, Shanghai, China                                  |
| YAP1 shRNA                                 |                    | Genechem, Shanghai, China                                  |
| negative control (NC) lentiviral vector    |                    | Genechem, Shanghai, China                                  |
| DAPI                                       | R37606             | life technologies                                          |
| anti-aurora B                              | ab2254             | Abcam                                                      |
| PrimeScript <sup>TM</sup> reagent kit      | RR037A             | Takara Bio, Kusatsu, Japan                                 |
| PureLink RNA Micro Scale Kit               | 12183016           | Life Technologies, Carlsbad, California, USA               |
| SYBR Green Power Premix Kits               | 4368577            | Applied Biosystems, Foster City, California                |
| RIPA Lysis Buffer                          | P0013B             | Beyotime, Shanghai, China                                  |
| anti-pATM                                  | ab81292            | Abcam                                                      |
| anti-Pitx2                                 | sc-390457          | SANTA CRUZ BIOTECHNOLOGY, Shanghai, China                  |
| anti-phospho-histone H3                    | 06-570             | Milipore                                                   |
| anti-YAP1                                  | ab52771            | Abcam                                                      |



Supplemental Table S3 patient's clinical information

| group                         | sample number | age          | sex          | SaO <sub>2</sub> (%) | PAH(mmHg)    | Previous surgical treatment |
|-------------------------------|---------------|--------------|--------------|----------------------|--------------|-----------------------------|
| Group A<br>(severe hypoxia)   | 1             | 4.2          | male         | 69                   | 87           | no                          |
|                               | 2             | 4.5          | male         | 73                   | 77           | no                          |
|                               | 3             | 4            | male         | 73                   | 65           | no                          |
|                               | 4             | 4.1          | male         | 71                   | 88           | no                          |
|                               | 5             | 3.9          | female       | 68                   | 65           | no                          |
|                               | 6             | 4            | female       | 69                   | 70           | no                          |
|                               | 7             | 3.8          | female       | 73                   | 72           | no                          |
|                               | 8             | 4.4          | female       | 71                   | 92           | no                          |
|                               | 9             | 4.6          | female       | 69                   | 90           | no                          |
|                               | 10            | 4.4          | male         | 70                   | 67           | no                          |
|                               | Average       | 4.2          | -            | 70.6                 | 77.3         | -                           |
|                               | SD            | 0.3          | -            | 1.9                  | 10.9         | -                           |
| Group B<br>(moderate hypoxia) | 11            | 4            | female       | 85                   | 95           | no                          |
|                               | 12            | 5            | female       | 84                   | 64           | no                          |
|                               | 13            | 4.1          | female       | 84                   | 97           | no                          |
|                               | 14            | 3            | female       | 84                   | 67           | no                          |
|                               | 15            | 3.5          | male         | 82                   | 98           | no                          |
|                               | 16            | 4.2          | male         | 82                   | 72           | no                          |
|                               | 17            | 3.6          | male         | 78                   | 89           | no                          |
|                               | 18            | 4.3          | male         | 78                   | 63           | no                          |
|                               | 19            | 3.7          | male         | 77                   | 65           | no                          |
|                               | 20            | 4.4          | male         | 76                   | 70           | no                          |
|                               | Average       | 4.0          | -            | 81.0                 | 78.0         | -                           |
|                               | SD            | 0.6          | -            | 3.4                  | 14.8         | -                           |
| Group C<br>(mild hypoxia)     | 21            | 3.8          | female       | 91.4                 | 85           | no                          |
|                               | 22            | 4            | female       | 88                   | 85           | no                          |
|                               | 23            | 3.5          | male         | 90                   | 70           | no                          |
|                               | 24            | 5            | male         | 88                   | 65           | no                          |
|                               | 25            | 3.4          | male         | 88                   | 70           | no                          |
|                               | 26            | 3.2          | male         | 88                   | 63           | no                          |
|                               | 27            | 3.3          | male         | 89                   | 68           | no                          |
|                               | 28            | 4.1          | male         | 90                   | 64           | no                          |
|                               | 29            | 4.2          | female       | 91                   | 67           | no                          |
|                               | 30            | 3.7          | female       | 87                   | 72           | no                          |
|                               | Average       | 3.8          | -            | 89.0                 | 70.9         | -                           |
|                               | SD            | 0.5          | -            | 1.5                  | 8.0          | -                           |
| <i>P</i>                      |               | <i>0.733</i> | <i>0.873</i> | <i>&lt;0.001</i>     | <i>0.444</i> |                             |

Supplemental Figure S1 HIF1A mRNA relative expression.

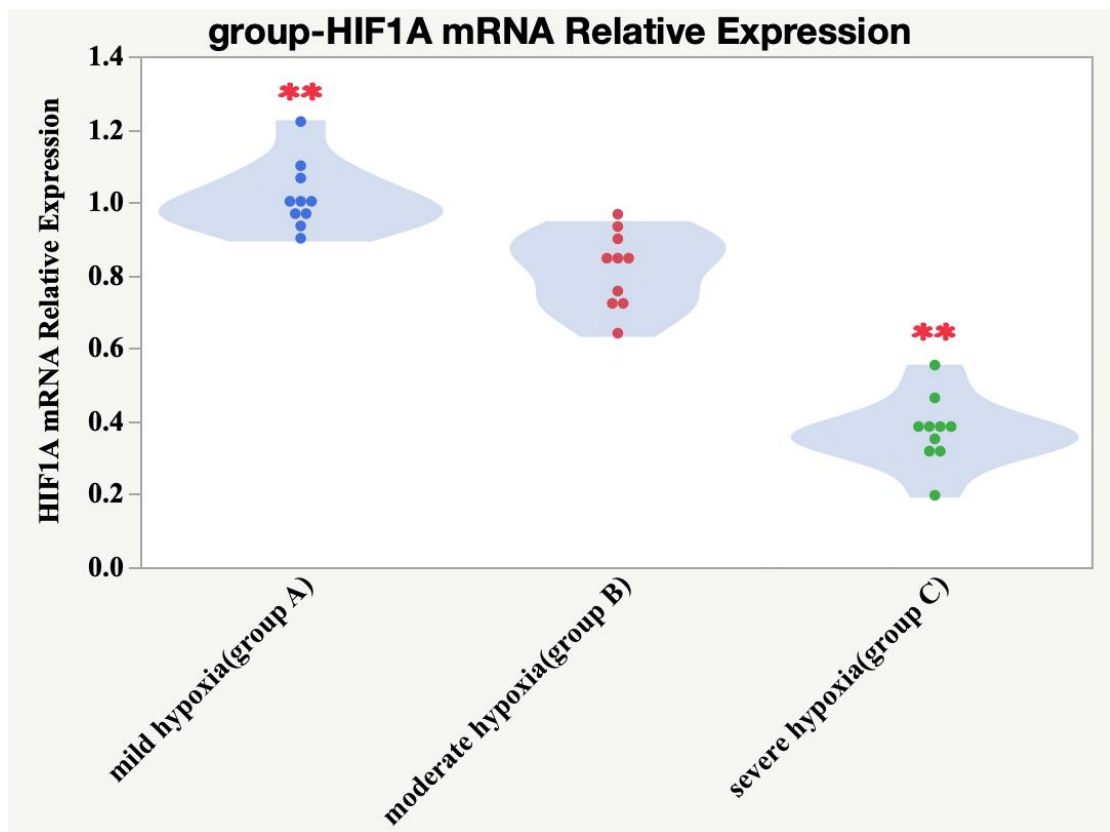

Supplement: mmc1.pdf [file mmc1.pdf]
